# Supplementary material for: Increased Frequency of Pink Bollworm Resistance to Bt Toxin Cry1Ac in China
Source: PLoS One. 2012 Jan 4;7(1):e29975. doi: 10.1371/journal.pone.0029975 (PMC3251611; doi:10.1371/journal.pone.0029975)
Supplement: Table S1 — Planting of Bt cotton and non-Bt cotton in the Yangtze River Valley from 2000 to 2010. (DOC) [file pone.0029975.s001.doc]

**Increased Frequency of Pink Bollworm Resistance to Bt Toxin Cry1Ac in China**

Peng Wan1,2, Yunxin Huang3, Huaiheng Wu2, Minsong Huang2, Shengbo Cong2 , Bruce E. Tabashnik4, Kongming Wu1*

1State Key Laboratory for Biology of Plant Diseases and Insect Pests, Institute of Plant Protection, Chinese Academy of Agricultural Sciences, Beijing, 100193, P.R. China. 2Institute of Plant Protection and Soil Science, Hubei Academy of Agricultural Sciences, Wuhan, 430064, P.R. China. 3College of Resource and Environment, Hubei University, Wuhan, 430062, P.R. China. 4Department of Entomology, University of Arizona, Tucson, Arizona, USA.

**Table S1. Planting of Bt cotton and non-Bt cotton in the Yangtze River Valley from 2000 to 2010.**

| Province | Cotton type |  | Planting area (1,000 ha) | | | | | | | | |  |
| --- | --- | --- | --- | --- | --- | --- | --- | --- | --- | --- | --- | --- |
| 2000 | 2001 | 2002 | 2003 | 2004 | 2005 | 2006 | 2007 | 2008 | 2009 | 2010 |
|  |  |  |  |  |  |  |  |  |  |  |  |  |
| Sichuan | Bt | 7 | 13 | 20 | 13 | 34 | 24 | 21 | 28 | 36 | 16 | 16 |
| Non-Bt | 65 | 53 | 37 | 19 | 15 | 4 | 4 | 3 | 1 | 1 | 1 |
|  |  |  |  |  |  |  |  |  |  |  |  |  |
| Hubei | Bt | 12 | 69 | 68 | 89 | 122 | 195 | 323 | 369 | 408 | 345 | 448 |
| Non-Bt | 306 | 278 | 225 | 266 | 286 | 195 | 81 | 50 | 39 | 36 | 27 |
|  |  |  |  |  |  |  |  |  |  |  |  |  |
| Hunan | Bt | 6 | 15 | 17 | 53 | 60 | 77 | 122 | 133 | 148 | 153 | 173 |
| Non-Bt | 140 | 135 | 113 | 86 | 108 | 74 | 9 | 13 | 17 | 8 | 5 |
|  |  |  |  |  |  |  |  |  |  |  |  |  |
| Jiangxi | Bt | 1 | 7 | 8 | 26 | 38 | 42 | 53 | 75 | 67 | 77 | 76 |
| Non-Bt | 68 | 64 | 47 | 39 | 25 | 22 | 13 | 7 | 7 | 3 | 1 |
|  |  |  |  |  |  |  |  |  |  |  |  |  |
| Anhui | Bt | 62 | 165 | 180 | 254 | 279 | 282 | 334 | 320 | 338 | 333 | 282 |
| Non-Bt | 246 | 198 | 141 | 137 | 120 | 94 | 59 | 56 | 37 | 11 | 15 |
|  |  |  |  |  |  |  |  |  |  |  |  |  |
| Jiangsu | Bt | 21 | 63 | 80 | 185 | 246 | 239 | 302 | 301 | 295 | 218 | 211 |
| Non-Bt | 274 | 321 | 232 | 185 | 164 | 129 | 53 | 26 | 16 | 12 | 25 |
|  |  |  |  |  |  |  |  |  |  |  |  |  |
| Total | Bt | 109 | 332 | 373 | 619 | 780 | 859 | 1155 | 1225 | 1292 | 1142 | 1205 |
| Non-Bt | 1100 | 1049 | 795 | 731 | 718 | 518 | 218 | 155 | 116 | 70 | 74 |
| Bt (%) | 9 | 24 | 31.9 | 45.9 | 52.1 | 62.4 | 84.1 | 88.8 | 91.8 | 94.2 | 94.2 |
